# Supplementary material for: Improved ORR/OER bifunctional catalytic performance of amorphous manganese oxides prepared by photochemical metal–organic deposition
Source: Royal Society of Chemistry journal article supplement (doi:10.1039/d1ra08618a), 2022-01-01
Supplement: d1ra08618a1.pdf [file d1ra08618a1.pdf]

Electronic Supplementary Material (ESI) for RSC Advances.

This journal is © The Royal Society of Chemistry

## **Improve the ORR/OER bifunctional catalytic performance with amorphous Mn oxides made by photochemical metal-organic deposition**

Fan Bai, ‡<sup>a</sup> Yuxiu He, ‡<sup>b</sup> Lincheng Xu, <sup>ac</sup> Yue Wang, <sup>a</sup> Yan Wang, <sup>a</sup> Zhanzhong Hao, <sup>\*c</sup> Fan Li <sup>\*a</sup>

*a. Faculty of Environment and Life sciences, Beijing University of Technology, Beijing, 100124, Beijing, P. R. China.*

**E-mail:** [vanadiumli@bjut.edu.cn](mailto:vanadiumli@bjut.edu.cn)

*b. Beijing Office of Metrohm China Ltd, Beijing 100085, P. R. China.*

*c. College of Chemistry, Baotou Teachers College, Bao Tou 014030, P. R. China.*

**E-mail:** [18438602389@163.com](mailto:18438602389@163.com)

### **Footnotes**

\* Corresponding authors

‡ These authors contributed equally to this work.

### **Synthesis of sample**

In this work, we used photochemical metal-organic deposition (PMOD) method to synthesize amorphous manganese oxides.

We choose manganese (II) 2-ethylhexanoate (6% Mn, Alfa Aesar) as the organic manganese source. 7.1114 g manganese (II) 2-ethylhexanoate (1.25 mmol Manganese) is put in a watch glass. 5 mL N-hexane is added into the watch glass to cover the bottom. Then we add 0.3000 g carbon powder XC-72 (25 mmol Carbon) which works as the conductive agent into the watch glass. The whole watch glass is placed in a ultrasonic cleaner with ultrasonic frequency of 40 kHz and ultrasonic power of 50 W (KQ-50B, Kunshan Ultrasonic instruments Co., Ltd) for ultrasound-assisted dispersion 10 min to dispersed this mixture uniformly. Three watch glasses of mixture above are placed in a dark chamber with 254 nm and 185 nm UV 48 W light sources (BOT-III, Beijing Zhongyiboteng Tech Co.,Ltd) and co-irradiated for 24 h, 48 h and 72 h respectively. After UV irradiation, all three watch glasses were dried in drying oven at 60 °C for 2 h. The uniform film formed is the target amorphous manganese oxide material.

Amorphous manganese oxide MnO<sub>x</sub>-PMOD with different UV treatments were named MnO<sub>x</sub>-PMOD24, MnO<sub>x</sub>-PMOD48 and MnO<sub>x</sub>-PMOD72.

To composite amorphous manganese oxides with Ti<sub>4</sub>O<sub>7</sub>, 7.1114 g manganese (II) 2-ethylhexanoate (1.25 mmol Manganese) is put in a watch glass. 5 mL N-hexane is added into the watch glass to cover the bottom. We add 0.3000 g carbon powder XC-72 (25 mmol Carbon) which works as the conductive agent into the watch glass. After that, we add 0.3790 g Ti<sub>4</sub>O<sub>7</sub> (1.25 mmol) into the mixture. Then the whole watch glass is placed in a ultrasonic cleaner with ultrasonic frequency of 40 kHz and ultrasonic power of 50 W (KQ-50B, Kunshan Ultrasonic instruments Co., Ltd) for ultrasound-assisted dispersion 10 min to dispersed this mixture uniformly. One watch glass of mixture above are placed in a dark chamber with 254 nm and 185 nm 48 W UV light sources (BOT-III, Beijing Zhongyiboteng Tech Co.,Ltd) and co-irradiated for 48 h. After UV irradiation, the watch glass is dried in drying oven at 60 °C for 2 h. Amorphous manganese oxide MnO<sub>x</sub> composited with Ti<sub>4</sub>O<sub>7</sub> was named MnO<sub>x</sub>/Ti<sub>4</sub>O<sub>7</sub>-PMOD.

## Electrochemical measurements

All of the electrochemical measurements were carried with a three-electrode system, including working electrode, reference electrode and rod counter electrode. The working electrode was chosen by different electrochemical measurements. For the cyclic voltammetry (CV), linear sweep voltammetry (LSV) and electrochemical impedance spectroscopy (EIS) tests, a glassy carbon working electrode of diameter  $\Phi = 5$  mm controlled by the rotating disk electrode (RDE, IPS RRDE). As for chronoamperometry (CA) and polarization curves tests, a glassy carbon piece of 10\*10 mm was used as working electrode. A Hg/HgO reference electrode (in 0.1 mol/L KOH, 0.165 V vs. RHE) was used as reference electrode and a carbon rod counter electrode ( $\Phi = 2$  mm) was used as counter electrode. A customized five-holes flask was used as electrolytic cell, filled with 0.1 mol/L KOH aqueous solution as electrolyte. The electrolyte was saturated in argon firstly in order to activate the system and then saturated in oxygen for further electrochemical measurements.

The CV and LSV tests were measured with saturated in oxygen 0.1 mol/L KOH aqueous solution at the scan rate of 10 mV/s. For LSV tests, the rotate speed of rotating disk electrode was chosen as 225, 400, 625, 900, 1225, 1600, 2025 and 2500 rpm. The curves of 1600 rpm were chosen for LSV images.

The EIS tests were measured with aerating oxygen continuously by aerator pipe at rotate speed of 1600 rpm.

The polarization curves tests were measured before and after 5000 cycles of CV tests for comparing ORR and OER catalytic stability of different catalytic material. Oxygen was essential during the whole measured process.

The CA tests were measured at potential of 0.68 V vs. RHE according to the potential of ORR. Oxygen was essential during the measured process.

The electrochemical active surface area (ECSA) for each system was estimated from the electrochemical double-layer capacitance ( $C_{DL}$ ) of the catalytic surface and specific capacitance ( $C_S$ ).<sup>S1,S2</sup> The formula was described as eq1:

$$ECSA = C_{DL}/C_S \quad \text{eq1}$$

As for  $C_s$ , it can be regarded as function of electrolyte system and adopted as  $0.05 \text{ mF/cm}^2$ .<sup>S3,S4</sup> To measure  $C_{DL}$ , a potential range in which non-Faradaic processes occur is determined from CV tests. The range is typically a  $0.1 \text{ V}$  potential window centered at the open-circuit potential (OCP) of the measured system. The formula was described as eq2:

$$i = v \cdot C_{DL} \quad \text{eq2}$$

where  $i$  is double-layer current and  $v$  is scan rate. Therefore, the CV tests were measured at range of  $\pm 0.06 \text{ V}$  vs. OCP in figure S9A-C. The scan rates were chosen as 20, 40, 60, 80 and  $100 \text{ mV/s}$  and  $i$  was current at the potential of OCP. A series of plots were described as  $i$ - $v$  curves with a slope equal to  $C_{DL}$  as shown in figure S9D.

The K-L equation can be calculated by eq3:

$$1/J = 1/J_L + 1/J_K = 1/(B\omega^{1/2}) + 1/J_K \quad \text{eq3}$$

where  $J$  is current density at a certain potential,  $J_L$  is dynamic current density,  $J_K$  limiting diffusion current density,  $\omega$  is rotate speed and  $B$  is function of electron transfer numbers  $n$ . A series of plots were described as  $(1/J)-(1/\omega^{1/2})$  curves with a slope equal to  $1/B$  and then electron transfer numbers  $n$  can be calculated. The K-L equation of different catalytic material were shown in figure S11 and S12 at the rotate speed of 225, 400, 625, 900, 1225, 1600, 2025 and  $2500 \text{ rpm}$  and scan rate of  $10 \text{ mV/s}$ .

### Preparation of carbon paper electrode (positive electrode in Li-O<sub>2</sub> battery)

The carbon paper electrode is prepared by spraying method in this study. With the mass ratio of 3:6:1,  $0.03 \text{ g}$  catalytic material,  $0.06 \text{ g}$  Super P conductive carbon black,  $0.20 \text{ g}$  5% PVDF are put in a  $50 \text{ mL}$  beaker and  $15 \text{ mL}$  N-methylpyrrolidone is added in it. The mixture is under magnetic stirring for about  $60 \text{ min}$  to make it uniform. After the mixture slurry appears slightly viscous, it is transferred into the gas compressor spray gun. The beaker is cleaned with a total of  $15 \text{ mL}$  N-methylpyrrolidone for 3-5 times, and transferred the residue to the spray gun. A cleaned and dried  $20 \text{ cm} \times 20 \text{ cm}$  carbon paper is fixed on a flat glass plate for spraying. The slurry is slowly and evenly sprayed on the surface of carbon paper until it is completely infiltrated. The carbon paper should be kept flat on the glass plate to prevent the slurry flowing on it. When the fluidity of the surface grout disappears, the second time spraying is carried out and the operation is repeated for several time until all the slurry is exhausted. The carbon paper covered with the active material is transferred into a vacuum drying oven for  $24 \text{ h}$  at  $80^\circ\text{C}$ . After that, it is cooled down to room temperature and stamped into circular sheets with  $14 \text{ mm}$  diameter by a slicer. The weight of active material is got through the weight difference between carbon paper circular sheet and blank carbon paper. The circular carbon paper electrodes are packed separately and kept in a vacuum drying oven for  $24 \text{ h}$  at  $120^\circ\text{C}$ . After cooling to room temperature, they are transferred to the glove box for battery assembling.

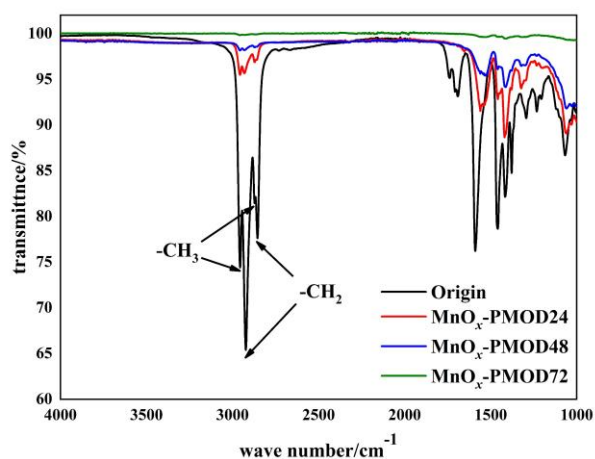

Figure S1 FTIR patterns of mixture before ultraviolet photolysis (Origin in Black) and amorphous manganese oxide  $\text{MnO}_x$  after ultraviolet photolysis of 24 h ( $\text{MnO}_x$ -PMOD24 in Red), 48 h ( $\text{MnO}_x$ -PMOD48 in Blue) and 72 h ( $\text{MnO}_x$ -PMOD72 in Green)

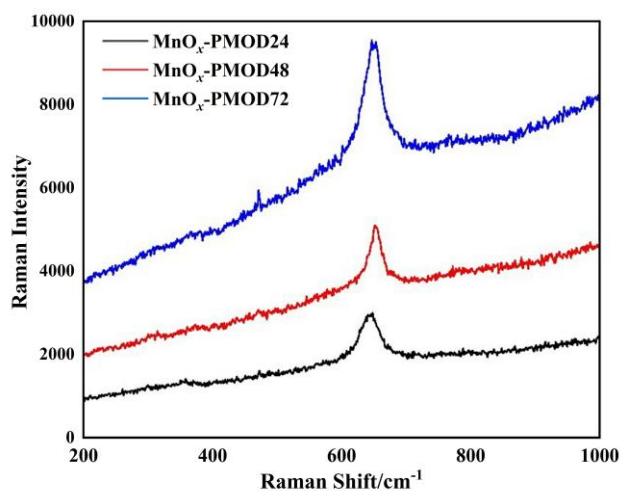

Figure S2 Raman patterns of amorphous catalysts  $\text{MnO}_x$ -PMOD24 (Black),  $\text{MnO}_x$ -PMOD48 (Red) and  $\text{MnO}_x$ -PMOD72(Blue)

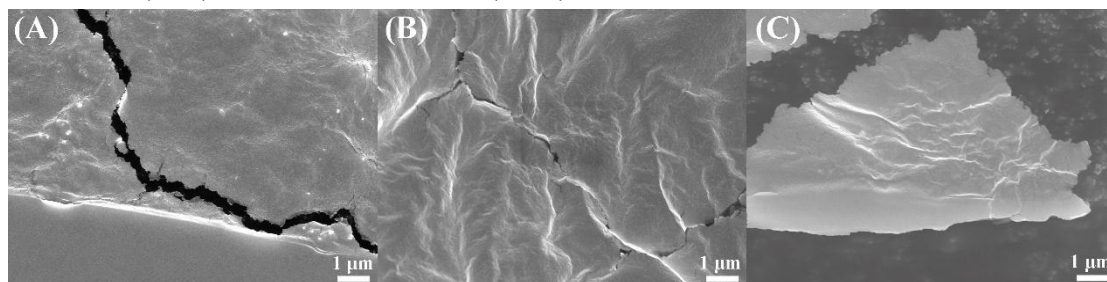

Figure S3 The SEM images show microstructure of amorphous catalysts (A)  $\text{MnO}_x$ -PMOD24, (B)  $\text{MnO}_x$ -PMOD48 and (C)  $\text{MnO}_x$ -PMOD72

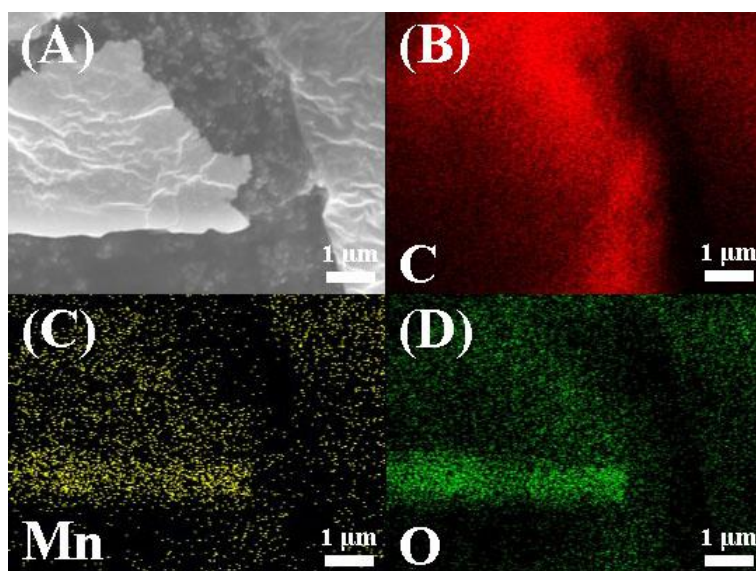

Figure S4 SEM and Energy dispersive spectrum (EDS) image of MnO<sub>x</sub>-PMOD72

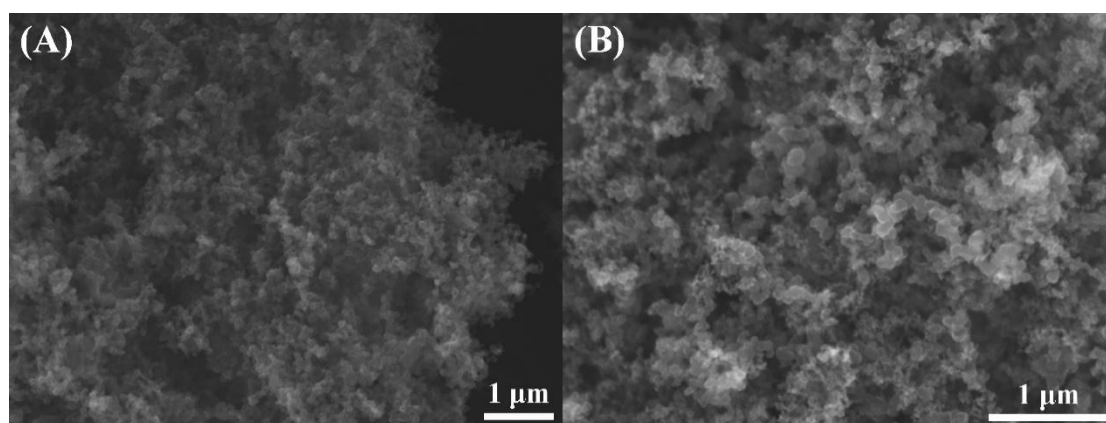

Figure S5 SEM images of (A) MnO<sub>x</sub>-PMOD48 (B) XC-72 after ultrasonic dispersion

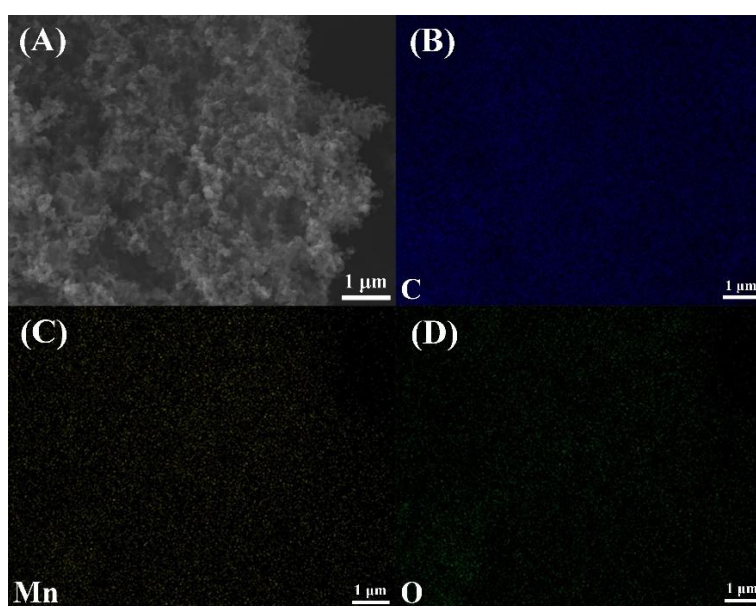

Figure S6 SEM and Energy dispersive spectrum (EDS) image of MnO<sub>x</sub>-PMOD48 after ultrasonic dispersion

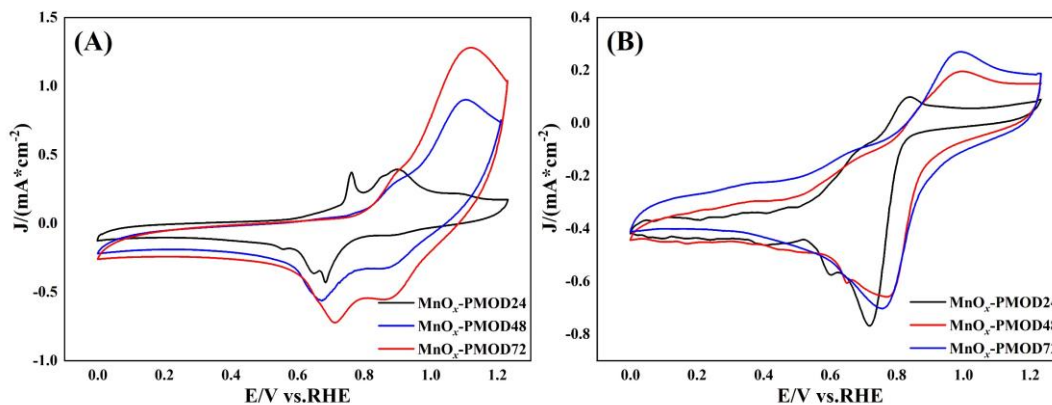

Figure S7 CV tests of  $\text{MnO}_x$ -PMOD24,  $\text{MnO}_x$ -PMOD48 and  $\text{MnO}_x$ -PMOD72, at the rate of 10 mV/s; saturated in (A)  $\text{N}_2$  and (B)  $\text{O}_2$

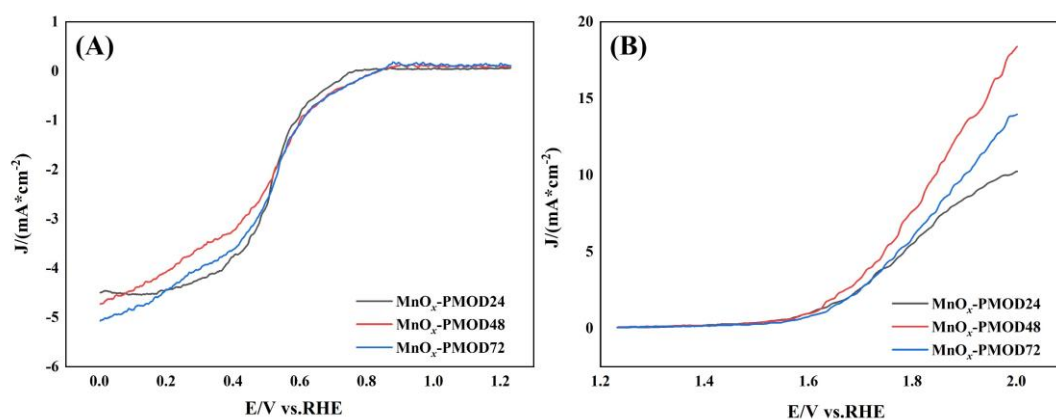

Figure S8 (A)ORR; (OER) curves of  $\text{MnO}_x$ -PMOD24,  $\text{MnO}_x$ -PMOD48 and  $\text{MnO}_x$ -PMOD72

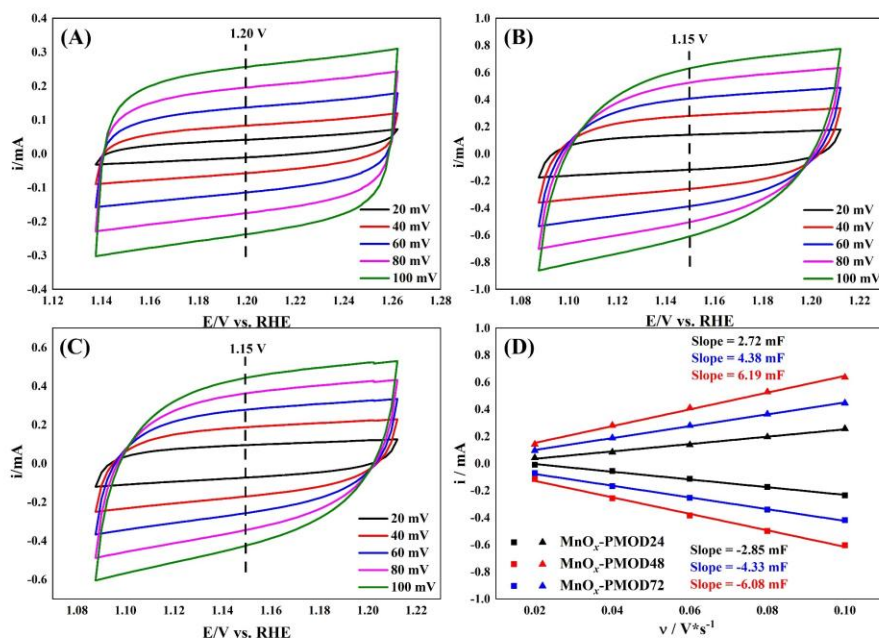

Figure S9 CV curves in a non-Faradaic region of (A)  $\text{MnO}_x$ -PMOD24, (B)  $\text{MnO}_x$ -



PMOD48 and (C)  $\text{MnO}_x$ -PMOD72, saturated in  $\text{O}_2$ ; (D) The cathodic and anodic currents measured at OCP as a function of scan rates

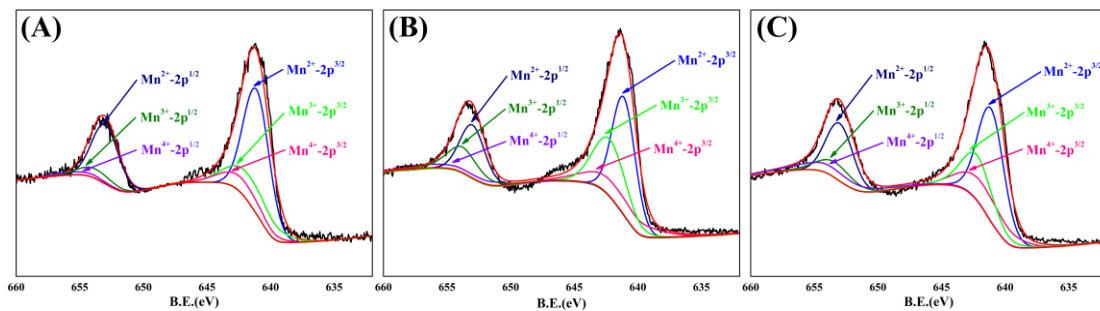

Figure S10. XPS patterns of Mn 2p of (A)  $\text{MnO}_x$ -PMOD24 (B)  $\text{MnO}_x$ -PMOD48 and (C)  $\text{MnO}_x$ -PMOD72

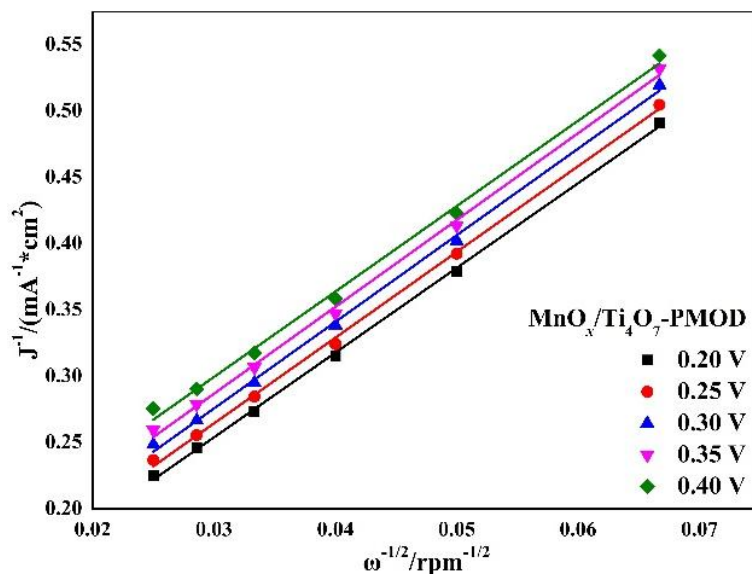

Figure S11. K-L equation fitting of amorphous catalyst  $\text{MnO}_x/\text{Ti}_4\text{O}_7$ -PMOD

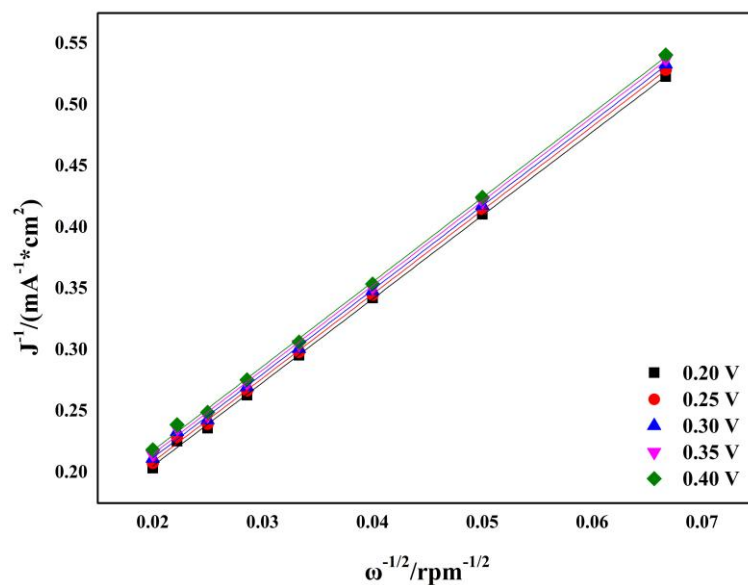

Figure S12. K-L equation fitting of crystalline catalyst  $\text{MnO}_x/\text{Ti}_4\text{O}_7$ -300

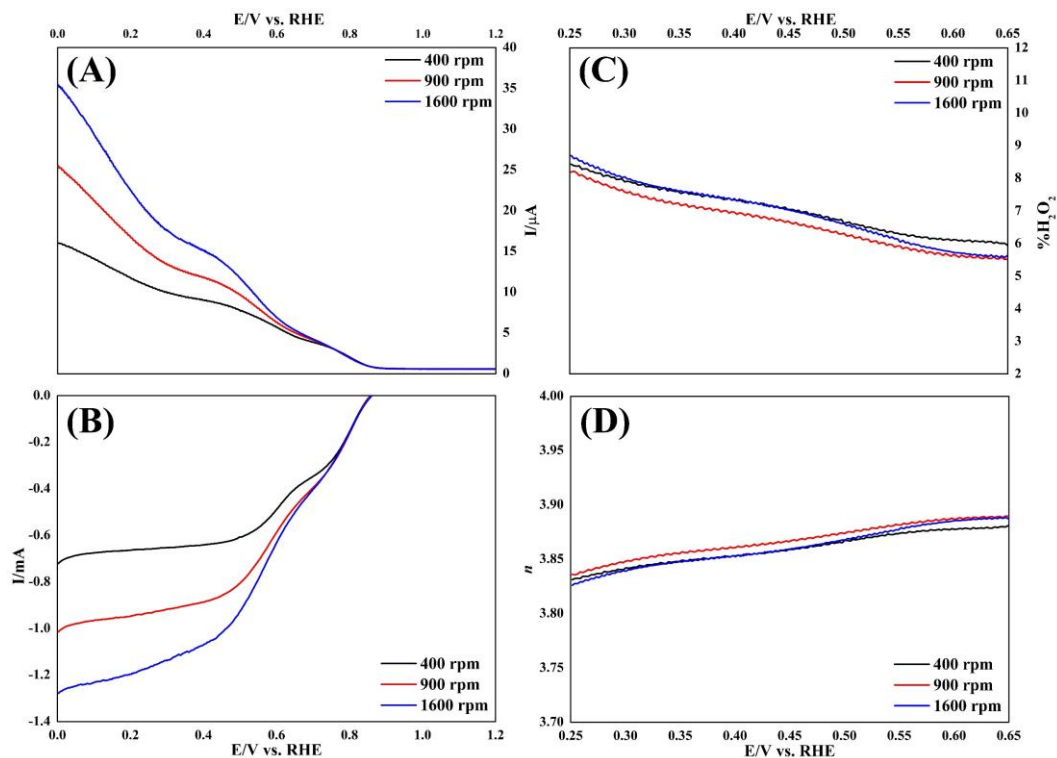

Figure S13. RRDE test of amorphous catalyst  $\text{MnO}_x/\text{Ti}_4\text{O}_7\text{-PMOD}$ . (A) ring current-potential, (B) disk current-potential, (C)  $\% \text{H}_2\text{O}_2$  and (D) electron transfer numbers; saturated in  $\text{O}_2$ , at the rate of  $10 \text{ mV/s}$

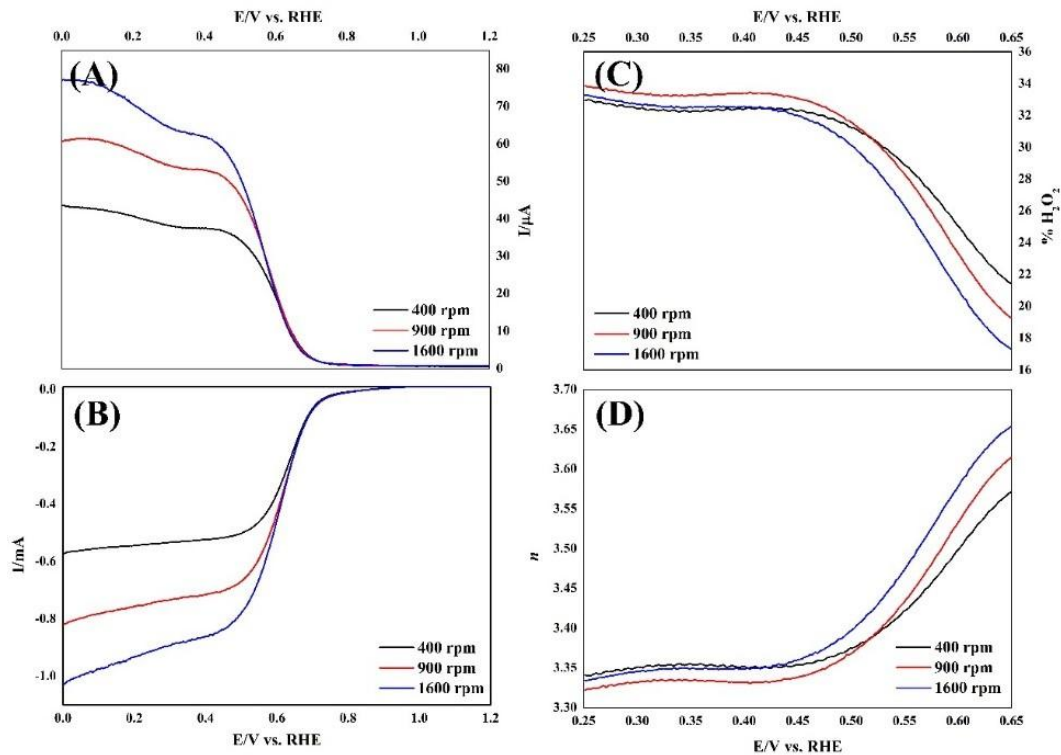

Figure S14. RRDE test of crystalline catalyst  $\text{MnO}_x/\text{Ti}_4\text{O}_7\text{-300}$ . (A) ring current-potential, (B) disk current-potential, (C)  $\% \text{H}_2\text{O}_2$  and (D) electron transfer numbers; saturated in  $\text{O}_2$ , at the rate of  $10 \text{ mV/s}$



Table S1 Valence state analysis of amorphous MnO<sub>x</sub> samples after different ultraviolet light decomposition obtained from XPS

| Sample name                  | orbit                               | Banding energy/eV | area  | Ratio of Mn <sup>2+</sup> /Mn <sup>3+</sup> /Mn <sup>4+</sup> |
|------------------------------|-------------------------------------|-------------------|-------|---------------------------------------------------------------|
| MnO <sub>x</sub> -<br>PMOD24 | Mn <sup>2+</sup> -2p <sup>3/2</sup> | 641.1             | 20758 | 0.693<br>0.221<br>0.086                                       |
|                              | Mn <sup>2+</sup> -2p <sup>1/2</sup> | 653.0             | 10379 |                                                               |
|                              | Mn <sup>3+</sup> -2p <sup>3/2</sup> | 641.6             | 6602  |                                                               |
|                              | Mn <sup>3+</sup> -2p <sup>1/2</sup> | 653.3             | 3301  |                                                               |
|                              | Mn <sup>4+</sup> -2p <sup>3/2</sup> | 642.2             | 2588  |                                                               |
|                              | Mn <sup>4+</sup> -2p <sup>1/2</sup> | 653.8             | 1294  |                                                               |
| MnO <sub>x</sub> -<br>PMOD48 | Mn <sup>2+</sup> -2p <sup>3/2</sup> | 641.1             | 36884 | 0.539<br>0.291<br>0.170                                       |
|                              | Mn <sup>2+</sup> -2p <sup>1/2</sup> | 653.0             | 18442 |                                                               |
|                              | Mn <sup>3+</sup> -2p <sup>3/2</sup> | 641.6             | 19880 |                                                               |
|                              | Mn <sup>3+</sup> -2p <sup>1/2</sup> | 653.3             | 9940  |                                                               |
|                              | Mn <sup>4+</sup> -2p <sup>3/2</sup> | 642.2             | 11614 |                                                               |
|                              | Mn <sup>4+</sup> -2p <sup>1/2</sup> | 653.8             | 5807  |                                                               |
| MnO <sub>x</sub> -<br>PMOD72 | Mn <sup>2+</sup> -2p <sup>3/2</sup> | 641.1             | 31838 | 0.483<br>0.278<br>0.239                                       |
|                              | Mn <sup>2+</sup> -2p <sup>1/2</sup> | 653.0             | 15919 |                                                               |
|                              | Mn <sup>3+</sup> -2p <sup>3/2</sup> | 641.6             | 18344 |                                                               |
|                              | Mn <sup>3+</sup> -2p <sup>1/2</sup> | 653.3             | 9172  |                                                               |
|                              | Mn <sup>4+</sup> -2p <sup>3/2</sup> | 642.2             | 15746 |                                                               |
|                              | Mn <sup>4+</sup> -2p <sup>1/2</sup> | 653.8             | 7873  |                                                               |

Table S2 Comparison of ORR/OER catalytic performance for benchmark noble metal and manganese oxide catalysts.

| Catalysts                                                      | Electrolyte             | Half-wave potential for ORR(V) | Overpotential for OER at 10 mA/cm <sup>2</sup> (mV) | Ref.      |
|----------------------------------------------------------------|-------------------------|--------------------------------|-----------------------------------------------------|-----------|
| Pt/C                                                           | 0.1 M KOH               | 0.82                           | --                                                  | S5        |
| PtGa NWs                                                       | 0.1 M HClO <sub>4</sub> | 0.86                           | --                                                  | S6        |
| IrO <sub>2</sub>                                               | 1.0 M KOH               | --                             | 255                                                 | S7        |
| RuO <sub>2</sub>                                               | 0.1 M KOH               | --                             | 390                                                 | S8        |
| NiFe-LDHs                                                      | 1.0 M KOH               | --                             | 190                                                 | S9        |
| α-MnO <sub>2</sub> -SF                                         | 0.1 M KOH               | 0.78                           | 490                                                 | S10       |
| Mn <sub>3</sub> O <sub>4</sub> /Ti <sub>3</sub> C <sub>2</sub> | 0.1 M KOH               | 0.85                           | --                                                  | S11       |
| Mn <sub>3</sub> O <sub>4</sub> -NR                             | 1.0 M NaOH              | 0.78                           | --                                                  | S12       |
| Mn <sub>3</sub> O <sub>4</sub>                                 | 0.1 M KOH               | --                             | Not achieve                                         | S13       |
| Our work                                                       | 0.1 M KOH               | 0.72                           | Not achieve                                         | S14       |
| Our work                                                       | 0.1 M KOH               | 0.75                           | 530                                                 | This work |

Table S3 Comparison of electrochemistry and battery performance for crystalline catalyst MnO<sub>x</sub>/Ti<sub>4</sub>O<sub>7</sub>-300 and amorphous catalyst MnO<sub>x</sub>/Ti<sub>4</sub>O<sub>7</sub>-PMOD

|                                                             | MnO <sub>x</sub> /Ti <sub>4</sub> O <sub>7</sub> -300 | MnO <sub>x</sub> /Ti <sub>4</sub> O <sub>7</sub> -PMOD |
|-------------------------------------------------------------|-------------------------------------------------------|--------------------------------------------------------|
| Onset potential for ORR                                     | 0.80 V vs. RHE                                        | 0.92 V vs. RHE                                         |
| Half-wave potential for ORR                                 | 0.72 V vs. RHE                                        | 0.75 V vs. RHE                                         |
| Limiting diffusion current for ORR                          | -4.34 mA/cm <sup>2</sup>                              | -5.21 mA/cm <sup>2</sup>                               |
| Onset potential for OER                                     | 1.71 V vs. RHE                                        | 1.60 V vs. RHE                                         |
| Overpotential for OER at 10 mA/cm <sup>2</sup>              | Not achieve                                           | 530 mV                                                 |
| Number of electron transferred from K-L equation            | 3.87                                                  | 3.89                                                   |
| Number of electron transferred from RRDE                    | 3.40                                                  | 3.87                                                   |
| Charge transfer resistance for Li-O <sub>2</sub> battery    | 158 Ω                                                 | 93.6 Ω                                                 |
| Discharge platform for Li-O <sub>2</sub> battery (cycle 1)  | 2.81 V                                                | 2.85 V                                                 |
| Discharge platform for Li-O <sub>2</sub> battery (cycle 20) | 2.78 V                                                | 2.81 V                                                 |
| Charge platform for Li-O <sub>2</sub> battery (cycle 1)     | 3.65 V                                                | 3.59 V                                                 |
| Charge platform for Li-O <sub>2</sub> battery (cycle 20)    | 4.10 V                                                | 3.67 V                                                 |

## References

- S1 S. Trasatti, O. A. Petrii, *Pure Appl. Chem.* 1991, **63**, 711-734.
- S2 C. C. L. McCrory, S. Jung, J. C. Peters and T. F. Jaramillo, *J Am Chem Soc*, 2013, **135**, 16977-16987.
- S3 K. Zeng, H. Yu, Z. Sun, J. Yan, X. Zheng, Y. Jiang, W. Hu, J. Tian and R. Yang, *ACS Appl. Mater. Interfaces*, 2020, **12**, 39205-39214.
- S4 P. Connor, J. Schuch, B. Kaiser and W. Jaegermann, *Z. Phys. Chem*, 2020; **234**, 979-994.
- S5 P. Chen, T. Zhou, L. Xing, K. Xu, Y. Tong, H. Xie, L. Zhang, W. Yan, W. Chu, C. Wu and Y. Xie, *Angew Chem Int Edit*, 2017, **129**, 625-629.
- S6 L. Gao, X. Li, Z. Yao, H. Bai, Y. Lu, C. Ma, S. Lu, Z. Peng, J. Yang, A. Pan and H. Huang, *J. Am. Chem. Soc*, 2019, **141**, 18083-18090.
- S7 W. Zhong, Z. Lin, S. Feng, D. Wang, S. Shen, Q. Zhang, L. Gu, Z. Wang and B. Fang, *Nanoscale*, 2019, **11**, 4407-4413.
- S8 M. Gao, W. Sheng, Z. Zhuang, Q. Fang, S. Gu, J. Jiang and Y. Yan, *J Am Chem Soc*, 2014, **136**, 7077-7084.
- S9 S. Jiao, Z. Yao, M. Li, C. Mu, H. Liang, Y. Zeng and H. Huang, *Nanoscale*, 2019, **11**, 18894-18899.
- S10 Y. Meng, W. Song, H. Huang, Z. Ren, S. Chen and S. L. Suib, *J Am Chem Soc*, 2014, **136**, 11452-11464.
- S11 Q. Xue, Z. Pei, Y. Huang, M. Zhu, Z. Tang, H. Li, Y. Huang, N Li, H. Zhang and C. Zhi, *J Mater Chem A*, 2017, **5**, 20818-20823.

- S12 J. Liu, L. Jiang, T. Zhang, J. Jin, L. Yuan and G. Sun, *Electrochim Acta*, 2016, **205**, 38-44.
- S13 S. Hirai, S. Yagi, A. Seno, M. Fujioka, T. Ohno and T. Matsuda, *Rsc Adv*, 2016, **6**, 2019-2023.
- S14 F. Bai, L. C. Xu, D. D. Wang, L. An, Z. Z. Hao and F. Li, *Rsc Advances*, 2021, 11, 1524-1530.
